# Supplementary material for: Magnetic biohybrid micromotors with high maneuverability for efficient drug loading and targeted drug delivery
Source: Royal Society of Chemistry journal article supplement (doi:10.1039/c9nr06221a), 2019-01-01
Supplement: c9nr06221a1.pdf [file c9nr06221a1.pdf]

# Supporting Information

## Magnetic biohybrid micromotors with high maneuverability for efficient drug loading and controlled release

Mengmeng Sun, Xinjian Fan, Xianghe Meng, Jianmin Song, Weinan Chen,  
Lining Sun, Hui Xie\*

State Key Laboratory of Robotics and Systems, Harbin Institute of Technology,  
2 Yikuang, Harbin 150001, China

Email: xiehui@hit.edu.cn.

**Video S1.** Magnetic propulsion of an individual micromotor in three motion modes (i.e., rolling, spinning and tumbling).

**Video S2.** Programmable navigated locomotion of individual micromotor in the bright and fluorescence mode.

**Video S3.** Multiple micromotors swimming as a team and controllable swarm locomotion.

**Video S4.** Controllable rotation of magnetic agglomerate inside the air sac by regulating the input magnetic field.

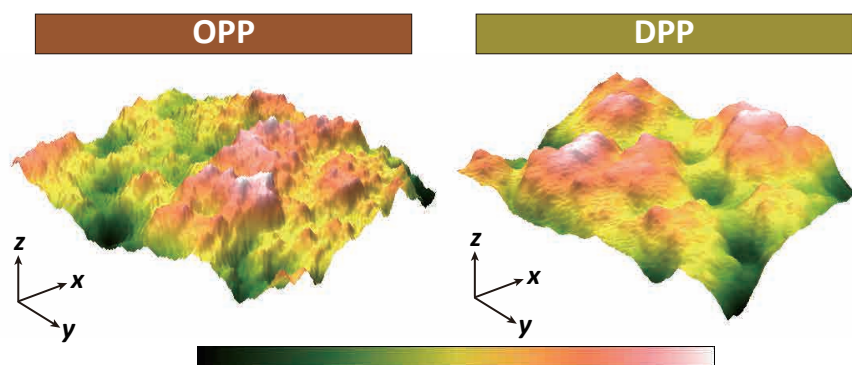

**Figure 1.** 3D AFM images of the hollow air sac surface of OPP and DPP.

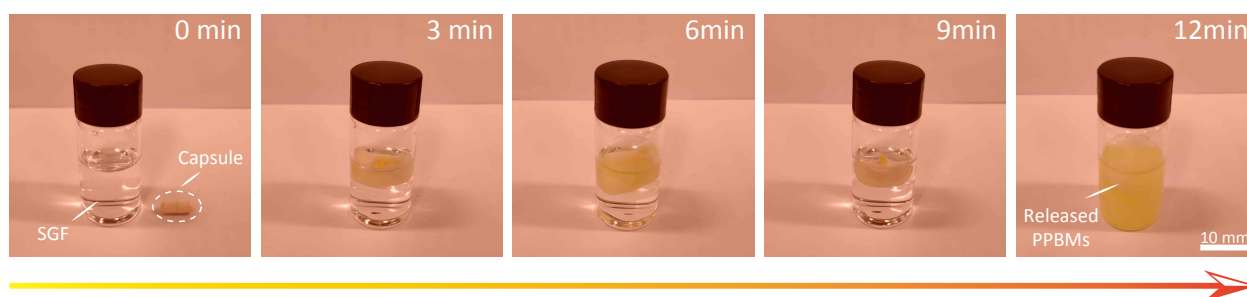

**Figure 2.** The whole process of dissolution of gastric-soluble capsules containing PPBM in the SGF media. And the released PPBM still keep stable morphology. Scar bar, 10 mm.

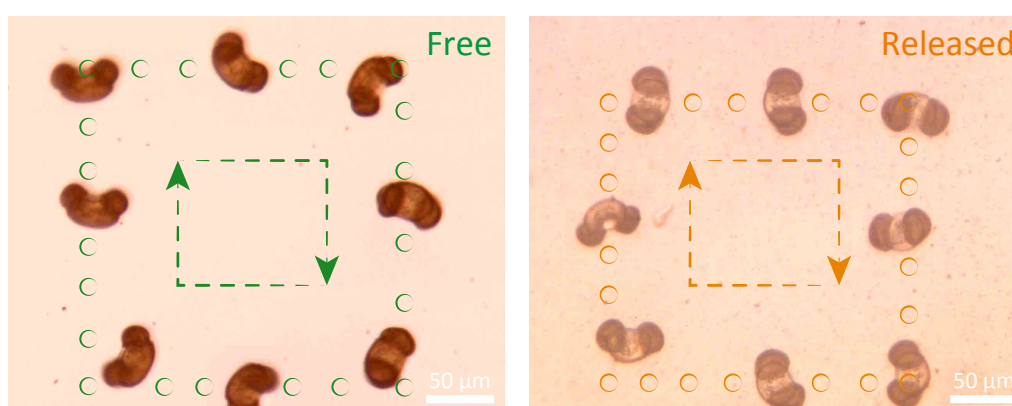

**Figure 3.** Time-lapse images displaying the navigated locomotion of free PPBM (left) and released PPBM from gastric-soluble capsule (right) in SGF. Scar bars, 50  $\mu\text{m}$ .

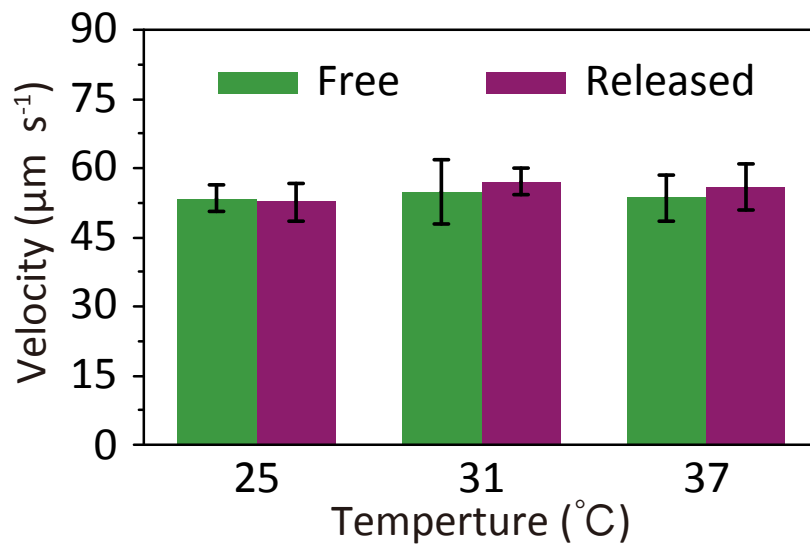

**Figure 4.** Comparison of the average velocities of free and released PPBMs in SGF at 25, 31 and 37 °C.

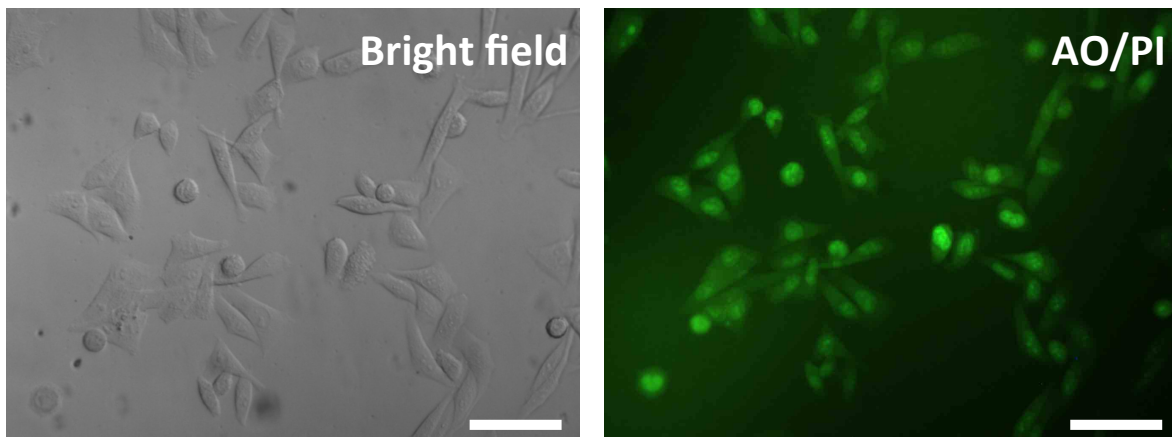

**Figure 5.** Control cell images without DOX-loaded PPBM. Scar bars, 50 μm.
